# Supplementary material for: Hydrolyzed Peptides from Pichia pastoris Improve Sperm Quality in Male Rats by Modulating the PI3K/AKT Signalling Pathway
Source: Research Square preprint supplement (doi:10.21203/rs.3.rs-7823492/v1), 2025-11-07
Supplement: Supplementary file 1 [file 5c16c7e83a4ee23b2f1e63a4.xlsx]

## Sheet: Sheet1
	groups	p-P38 gray value		P38 gray value			normalized value	average value	standard deviation	Shapiro Wilk test		t-test / Mann Whitney test			P38					p-P38					GAPDH
P38	NC1	29127.1		32542.5			0.895049	0.74842	0.184003	0.59504
	NC2	27685.3		28398.5			0.974886
	NC3	18478.1		25539.4			0.723513
	NC4	22331.5		37167.6			0.600832
	NC5	16314.5		29780.6			0.547822
	PHP3 1	17792.6		30323.9			0.586751	0.700126	0.161543	0.181951		0.670861
	PHP3 2	18358.9		18984.9			0.96703
	PHP3 3	16654.9		22835.9			0.729331
	PHP3 4	12504.6		19363			0.645802
	PHP3 5	12172.8		21291.7			0.571715
		p-JNK gray value		JNK gray value			normalized value	average value	standard deviation	Shapiro Wilk test		t-test / Mann Whitney test			JNK					p-JNK					GAPDH
JNK	NC1	26600		29359.8			0.906	1.180934611	0.440616	0.912233
	NC2	20754.5		30463.3			0.681295
	NC3	35029		25854.8			1.35483
	NC4	29600.3		26094.3			1.13436
	NC5	37592.2		20562.6			1.82818
	PHP3 1	8192.42		14390.5			0.569292	0.499997	0.07057	0.350695		*0.024940
	PHP3 2	7016.15		12508.6			0.560906
	PHP3 3	11160.1		27033.9			0.412821
	PHP3 4	10500.2		23836.2			0.440514
	PHP3 5	11564		22391.4			0.51645
		p-AKT gray value		AKT gray value			normalized value	average value	standard deviation	Shapiro Wilk test		t-test / Mann Whitney test			AKT					p-AKT					GAPDH
AKT	NC1	20546.2		19426.2			1.05766	1.235418366	0.493175	0.012485＜0.05
	NC2	17192.3		19001.3			0.904798
	NC3	20821.1		21148.8			0.984502
	NC4	23093.9		20531.8			1.12479
	NC5	37575		17847.4			2.10535
	PHP3 1	18014.3		20346.4			0.88538	0.645433	0.29548	0.10172		*0.02828
	PHP3 2	10408.1		10009.7			1.0398
	PHP3 3	13002.4		32290.9			0.402663
	PHP3 4	11657.6		26916.5			0.433101
	PHP3 5	13722.2		29432.6			0.466223
		p-P85 gray value		P85 gray value			normalized value	average value	standard deviation	Shapiro Wilk test		t-test / Mann Whitney test			P85					p-P85					GAPDH
P85	NC1	15140.5		16447.7			0.920524	1.01422	0.091146	0.150266
	NC2	12501.3		12478.4			1.00183
	NC3	17643.8		17774.9			0.992627
	NC4	21572.6		18491.7			1.16661
	NC5	24880.4		25143.5			0.989536
	PHP3 1	28279		30760.6			0.919327	0.782231	0.114924	0.579147		**0.007657
	PHP3 2	18904.4		29046.3			0.650838
	PHP3 3	18791.7		26689.6			0.704085
	PHP3 4	18986.5		25146.1			0.755045
	PHP3 5	21896.6		24830.1			0.881857
		p-ERK gray value		ERK gray value			normalized value	average value	standard deviation	Shapiro Wilk test		t-test / Mann Whitney test			ERK					p-ERK					GAPDH
ERK	NC1	24272.6		23485			1.03354	1.1145	0.084828	0.358814
	NC2	23369.9		21796.2			1.0722
	NC3	23397.5		20397.5			1.14708
	NC4	25213.9		20216.4			1.2472
	NC5	18226.1		16994.7			1.07246
	PHP3 1	22995.9		16934.8			1.35791	1.101308047	0.346551	0.569347		0.937692
	PHP3 2	26613.2		17062.8			1.55973
	PHP3 3	17042.4		17942			0.949859
	PHP3 4	12739.1		13757.9			0.92595
	PHP3 5	17575.6		24647			0.713095
